# Supplementary material
Source: PubMed Central journal article supplement (PMC2895090)
Supplement: 1006689107_pnas.201006689SI.pdf [file 1006689107_pnas.201006689SI.pdf]

# Supporting Information

Haley et al. 10.1073/pnas.1006689107

## SI Text

**PCR Cloning Primers. *ftz* intron.** Cloned as separate parts into pCR2.1-TOPO and then transferred to pAc5.1\_B.

**Part I.** F: CCA CTA GTG ACA GCC CCG AAC GGA GCC  
R: CCT CTA GAG GTA CCC ATA TTT TCA ATA TTT  
TCA AAG TGT ATT TTT AGG GG

**Part II.** F: CCA CTA GTC TCG AGT TTG TAT ACA TTT TTG  
ATA TTT TCA AAC AAT ACG CA

R: CCT CTA GAC TCC AGG GTC TGG TAG CGG G  
*ftz* intron in *pattB*-UAST (PCR amplified from *ftz* intron in pAc5.1)

F: CCG AAT TCG ACA GCC CCG AAC GGA GCC  
R: CCT CTA GAC TCC AGG GTC TGG TAG CGG G

**tomosyn intron.** Cloned as separate parts into pCR2.1-TOPO and then transferred to pAc5.1\_B.

**Part I.** F: CCA CTA GTC AAA GCG TTC AGC CCC AAG CCA  
CAC

R: CCT CTA GAG GTA CCA CAG ATG CCT TTC GAT  
TAT GGG CAC

**Part II.** F: CCA CTA GTC TCG AGC GTT GTC TAA GAG CTT  
CAA AAT CGA TAA TAA C

R: CCT CTA GAG GAT GTG GGC GAG TAT GGA AAG  
CC

**Reporter Genes. *eGFP/mCherry*.** F: CCT CTA GAA TGG TGA GCA  
AGG GCG AGG

R: CCA CTA GTG CTA GCT TAC TTG TAC AGC TCG  
TCC ATG CC

*eGFP* +1 (will introduce frameshift if *ftz* intron is spliced into shmiR hairpin) (Fig. S6)

F: CCT CTA GAC ATG GTG AGC AAG GGC GAG G  
R: CCA CTA GTG CTA GCT TAC TTG TAC AGC TCG  
TCC ATG CC

***Renilla luciferase*.** F: CCT CTA GAA TGA CTT CGA AAG TTT  
ATG ATC CAG AAC AAA GGA AAC

R: CCG CTA GCA ATT ATT GTT CAT TTT TGA GAA  
CTC GCT C

***miR-1* cloning primers.** F: CCA AGT GAG TAG TGC CAC  
R: CGG TTC TAC TTC TGT TTC AAT C

**RT-PCR Primers (Performed in Fig. S6). *ftz* intron.** F: CCT CTA GAA  
TGG TGA GCA AGG GCG AGG

R: AGC TCC TCG CCC TTG CTC AC

**Northern blot probes. *dpp* shmiR:** CCA CTC TAG TCG AGA  
TCG AGA

*dpp-5* shmiR: GGT GAC TAG TCG AGA TCG AGA  
2S RNA: TAC AAC CCT CAA CCA TAT GTA GTC CAA  
GCA









**Table S2. shLuciferase (GL3) 2**

Oligonucleotide sequences used to clone Luciferase-targeting shmiRs

|                        |         |                                                                           |
|------------------------|---------|---------------------------------------------------------------------------|
| lucNE siRNA            |         |                                                                           |
| TTCCGTCATCGTCTTTCCGT   |         |                                                                           |
| lucNE-2                | pNE top | ctagcagtTGGGAAAGACCATGACGGATAtagttatattcaagcataTTCCGTCATCGTCTTTCCCAgcg    |
| TTCCGTCATCGTCTTTCCCA   | pNE bot | aattcgcTGGGAAAGACGATGACGGAAAtatgcttgaatataactaTATCCGTCATGGTCTTTCCCAactg   |
| lucNE-3                | pNE top | ctagcagtTGCAGAAAGACCATGACGGATAtagttatattcaagcataTTCCGTCATCGTCTTTCCGCAgcg  |
| TTCCGTCATCGTCTTTCCGCA  | pNE bot | aattcgcTGCAGAAAGACGATGACGGAAAtatgcttgaatataactaTATCCGTCATGGTCTTTCCGCAactg |
| lucNE-4                | pNE top | ctagcagtTGCCAAAGACCATGACGGATAtagttatattcaagcataTTCCGTCATCGTCTTTGGCAgcg    |
| TTCCGTCATCGTCTTTGGCA   | pNE bot | aattcgcTGCCAAAGACGATGACGGAAAtatgcttgaatataactaTATCCGTCATGGTCTTTGGCAactg   |
| lucNE-5                | pNE top | ctagcagtTGCCTAAGACCATGACGGATAtagttatattcaagcataTTCCGTCATCGTCTTAGGCAgcg    |
| TTCCGTCATCGTCTTAGGCA   | pNE bot | aattcgcTGCCTAAGACGATGACGGAAAtatgcttgaatataactaTATCCGTCATGGTCTTAGGCAactg   |
| lucNE-1(5')            | pNE top | ctagcagtACGGAAAGACCATGACGGATTtagttatattcaagcataATTCCGTCATCGTCTTTCCGTgcg   |
| ATTCCGTCATCGTCTTTCCGT  | pNE bot | aattcgcACGGAAAGACGATGACGGAAAtatgcttgaatataactaAATCCGTCATGGTCTTTCCGTactg   |
| lucNE-1(5'),-3         | pNE top | ctagcagtTGCAGAAAGACCATGACGGATTtagttatattcaagcataATTCCGTCATCGTCTTTCCGCAgcg |
| ATTCCGTCATCGTCTTTCCGCA | pNE bot | aattcgcTGCAGAAAGACGATGACGGAAAtatgcttgaatataactaAATCCGTCATGGTCTTTCCGCAactg |

**Table S3. shDpp2 (*dpp*<sup>shmiR</sup>) all placed in *pattb*-NE3 backbone**Oligonucleotide sequences used to clone *dpp*-targeting shmiRs

|                       |         |                                                                         |
|-----------------------|---------|-------------------------------------------------------------------------|
| dpp2 siRNA            | pNE top | ctagcagtCCACTCTAGTGGAGATCGACAtagttatattcaagcataTCTCGATCTCGACTAGAGTGGgcg |
| TCTCGATCTCGACTAGAGTGG | pNE bot | aattcgcCCACTCTAGTGGAGATCGACAtatgcttgaatataactaTGTCGATCTCCACTAGAGTGGactg |
| dpp2-2 siRNA          | pNE top | ctagcagtGGACTCTAGTGGAGATCGACAtagttatattcaagcataTCTCGATCTCGACTAGAGTCCgcg |
| TCTCGATCTCGACTAGAGTCC | pNE bot | aattcgcGGACTCTAGTGGAGATCGACAtatgcttgaatataactaTGTCGATCTCCACTAGAGTCCactg |
| dpp2-3 siRNA          | pNE top | ctagcagtGGTCTCTAGTGGAGATCGACAtagttatattcaagcataTCTCGATCTCGACTAGAGACCgcg |
| TCTCGATCTCGACTAGAGACC | pNE bot | aattcgcGGTCTCTAGTGGAGATCGACAtatgcttgaatataactaTGTCGATCTCCACTAGAGACCactg |
| dpp2-4 siRNA          | pNE top | ctagcagtGGTGTCTAGTGGAGATCGACAtagttatattcaagcataTCTCGATCTCGACTAGACACCgcg |
| TCTCGATCTCGACTAGACACC | pNE bot | aattcgcGGTGTCTAGTGGAGATCGACAtatgcttgaatataactaTGTCGATCTCCACTAGACACCactg |
| dpp2-5 siRNA          | pNE top | ctagcagtGGTGACTAGTGGAGATCGACAtagttatattcaagcataTCTCGATCTCGACTAGTACCgcg  |
| TCTCGATCTCGACTAGTACC  | pNE bot | aattcgcGGTGACTAGTGGAGATCGACAtatgcttgaatataactaTGTCGATCTCCACTAGTACCactg  |
| dpp2MUT siRNA         | pNE top | ctagcagtCCACTCTAGACCAGAAGCACAtagttatattcaagcataTCTGCTTCTGCTCTAGAGTGGgcg |
| TCTGCTTCTGCTCTAGAGTGG | pNE bot | aattcgcCCACTCTAGAGCAGAAGCAGAtatgcttgaatataactaTGTGCTTCTGGTCTAGAGTGGactg |
| dpp2-1(5'),-4 siRNA   | pNE top | ctagcagtGGTGTCTAGTGGAGATCGACTtagttatattcaagcataACTCGATCTCGACTAGACACCgcg |
| ACTCGATCTCGACTAGACACC | pNE bot | aattcgcGGTGTCTAGTGGAGATCGACTtagttatattcaagcataAGTCGATCTCCACTAGACACCactg |

**Table S4. *shftz* splice acceptor and *shwhite* splice acceptors originally cloned into *pattb*-NE3 vector**

Oligonucleotide sequences used to clone splice acceptor-containing shmiRs\*

|                             |         |                                                                          |
|-----------------------------|---------|--------------------------------------------------------------------------|
| <i>ftz</i> acceptor shmiR   | pNE top | CTAGCAGTTGCAATCTGTTAGCATAAAGGATAGTTATATTCAAGCATATGCTTATGCTTACAGATTGCAGCG |
| TGCTTATGCTTACAGATTGCA       | pNE bot | AATTCGCTGCAATCTGTAAGCATAAAGCATATGCTTGAATATAACTATCCTTATGCTAACAGATTGCAACTG |
| <i>white</i> acceptor shmiR | pNE top | CTAGCAGTGCAACCATCTCAAATTAATATAGTTATATTCAAGCATATTTTAATTTGCAGATGGTTGCGCG   |
| TTTTAATTTGCAGATGGTTGC       | pNE bot | AATTCGCGCAACCATCTGCAAATTAATAATATGCTTGAATATAACTATATTAATTTGGAGATGGTTGCACTG |

\*From Fig. S6.
